# Supplementary material
Source: Frontiers journal article supplement (https://www.frontiersin.org/articles/526995)

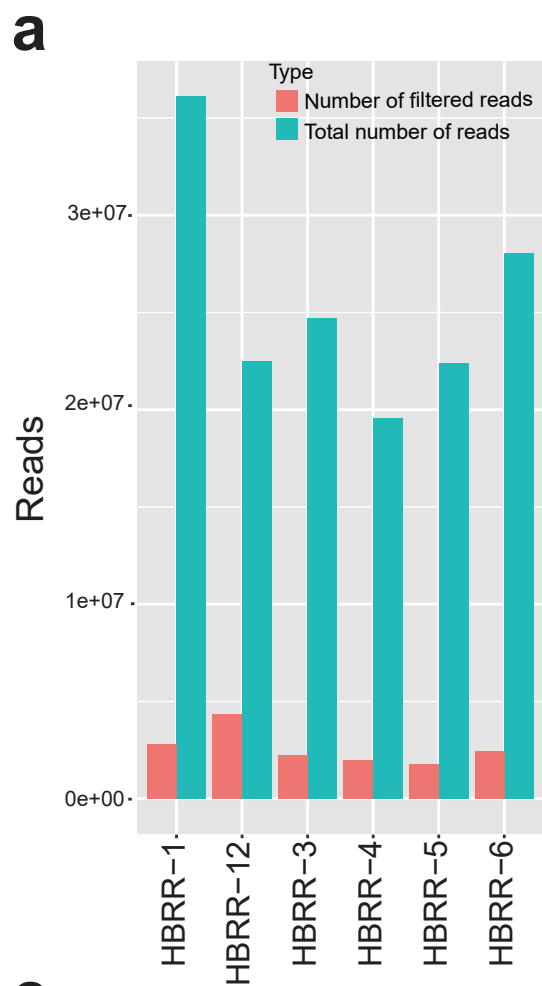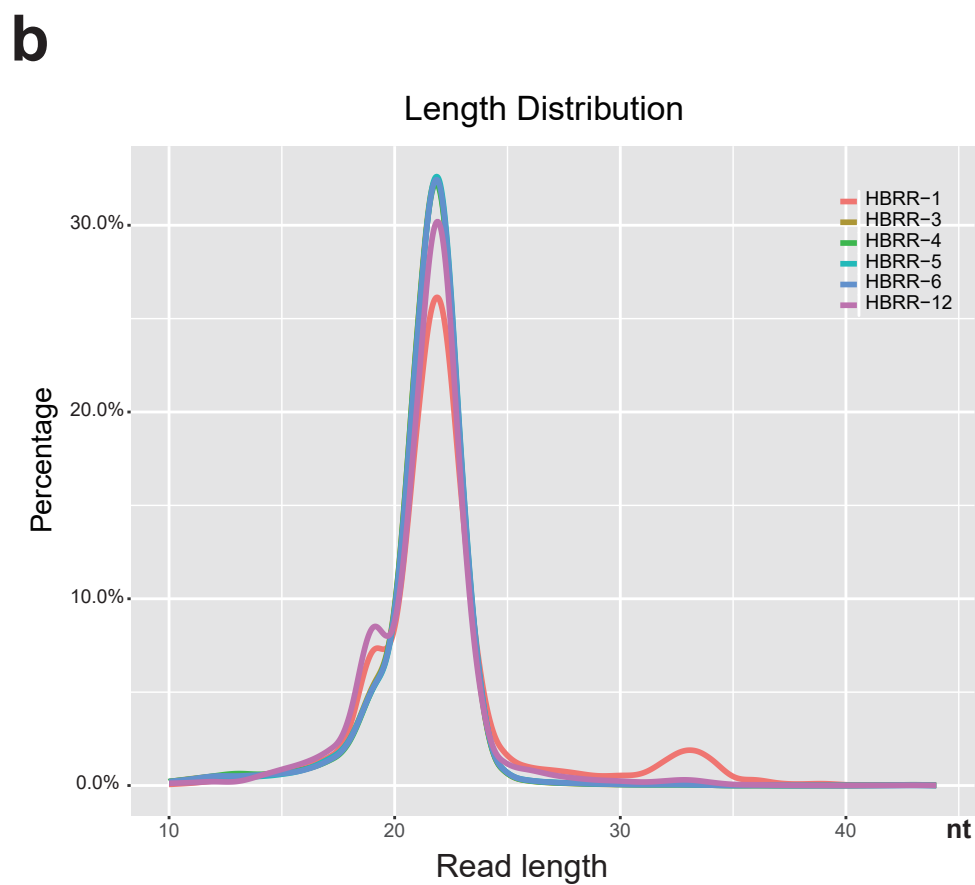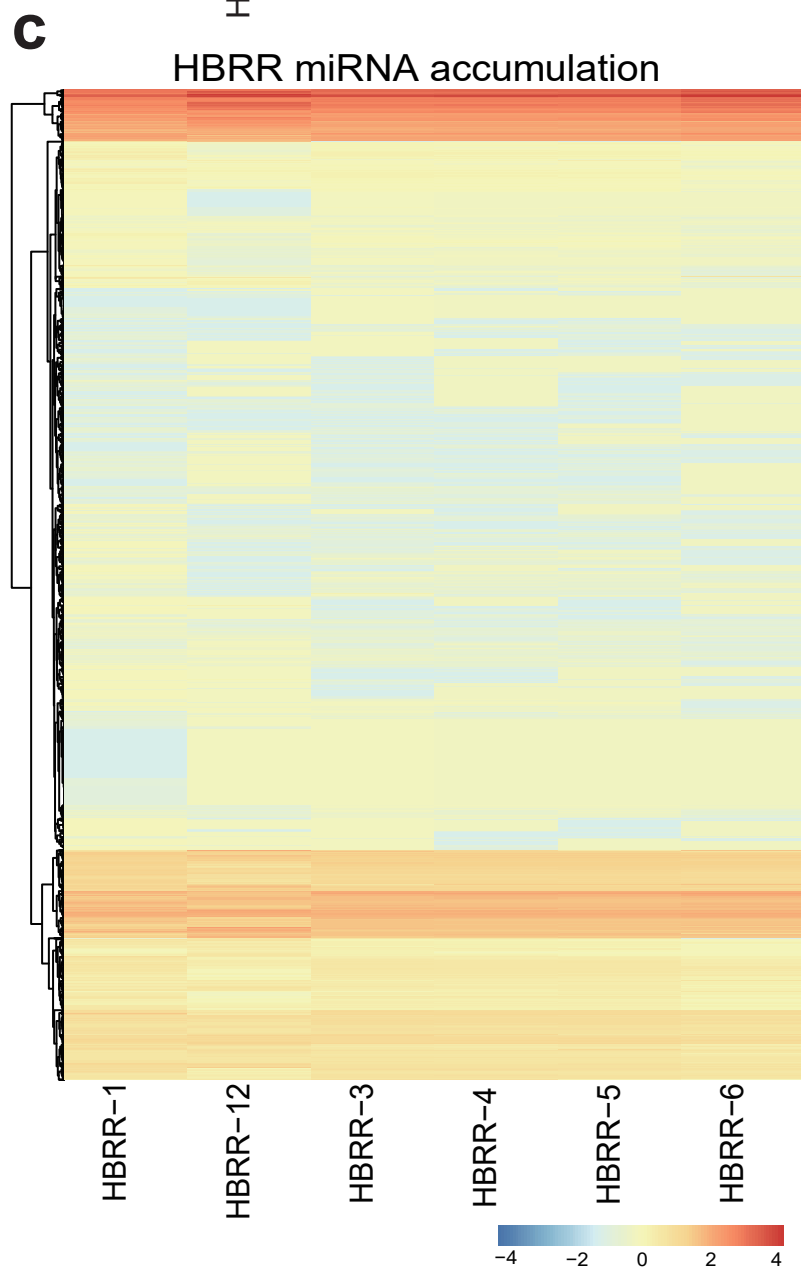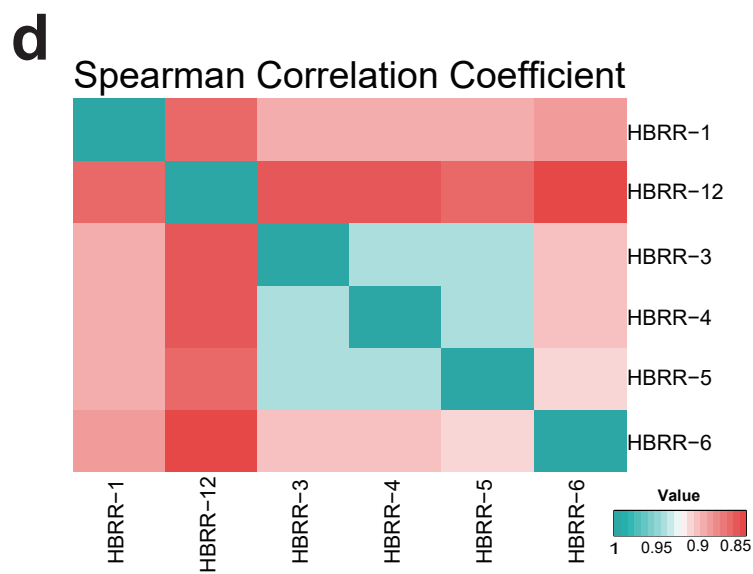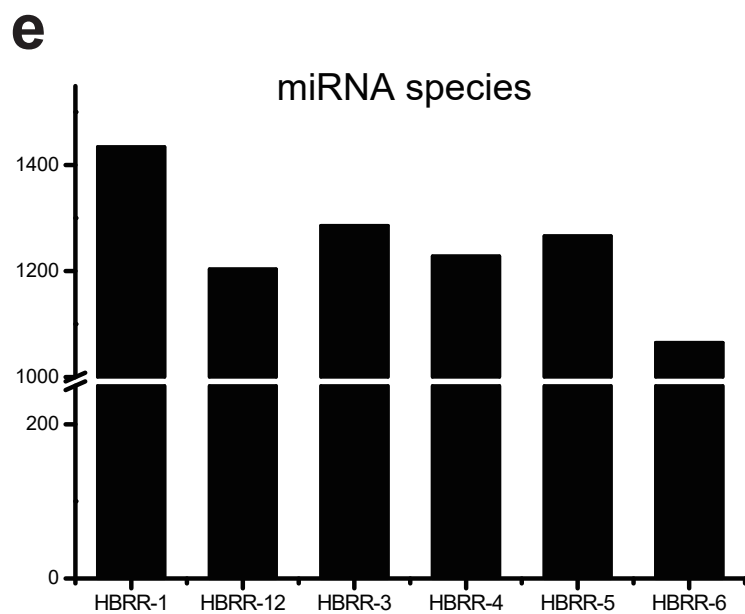

Supplement: Data_Sheet_4.PDF [file Data_Sheet_4.PDF]
